# Supplementary material
Source: PubMed Central journal article supplement (PMC9589120)
Supplement: mmc1.pdf [file mmc1.pdf]

**Cell Reports Medicine, Volume 3**

**Supplemental information**

**Machine learning for determining  
lateral flow device results for testing of  
SARS-CoV-2 infection in asymptomatic populations**

**The LFD AI Consortium**

1 **Supplementary Materials for Beggs et al**

2 Supplementary table 1: Table of viral loads in reference specimens as determined by real  
3 time PCR of ORF1ab and N genes vs. supplied concentrations of PFU/ml. Related to Figure  
4 2.

| PFU/ml | Ct ORF1ab | Ct N |
|--------|-----------|------|
| 10000  | 17.9      | 21.7 |
| 1000   | 24.3      | 27.4 |
| 100    | 27.4      | 30.3 |
| 10     | 33.5      | 35.2 |
| 1      | 35.6      | 38.6 |

5

6 List of affiliations of secondary authors:

7 NHS Test & Trace: Robert Banathy, Mark Branigan, Paul Lewis-Borman, Nishali Patel,  
8 Lennard Lee, Tom Fowler

9 Durham University; Camila C. S. Caiado

10 Sensyne Plc: Anna Dijkstra, Piotr Chudzik, Paria Yousefi, Avelino Javer, Bram Van Meurs,  
11 Lionel Tarassenko, Benjamin Irving

12 University of Birmingham: Celina Whalley, Neeraj Lal, Helen Robbins, Elaine Leung, Andrew  
13 D Beggs

14
